# Supplementary material
Source: PubMed Central journal article supplement (PMC4794073)

## WEB APPENDICIES: SUPPLEMENTAL MATERIAL

### Page

|      |                                                                                                                                                                                                               |
|------|---------------------------------------------------------------------------------------------------------------------------------------------------------------------------------------------------------------|
| 1    | <b>Table of Contents</b>                                                                                                                                                                                      |
| 2    | <b>Web Appendix Table 1.</b> International Classification of Disease, Ninth Revision, Clinical Modification Codes Used to Define Heart Failure, Acute Myocardial Infarction, and Pneumonia Cohorts            |
| 3    | <b>Web Appendix Table 2.</b> Age-Sex-Race Standardized Relative Risks of Hospitalization and Death Comparing Study Populations to the Medicare Fee-for-Service Population                                     |
| 4-6  | <b>Web Appendix Figure 1.</b> Flow Diagrams Describing Patient Exclusions for Heart Failure, Acute Myocardial Infarction, and Pneumonia Cohorts.                                                              |
| 7-8  | <b>Web Appendix Figure 2.</b> Risk of First Rehospitalization and Death by Day after Hospitalization for Heart Failure, Acute Myocardial Infarction, or Pneumonia                                             |
| 9-11 | <b>Web Appendix Figure 3.</b> Cumulative Incidence Functions for Competing Risk Analysis of First Rehospitalization by Day After Hospitalization for Heart Failure, Acute Myocardial Infarction, or Pneumonia |

**Web Appendix Table 1. International Classification of Disease, Ninth Revision, Clinical Modification Codes Used to Define Heart Failure, Acute Myocardial Infarction, and Pneumonia Cohorts**

| <b>Cohort Name</b>                 | <b>Constituent ICD-9-CM Codes</b>                                                            |
|------------------------------------|----------------------------------------------------------------------------------------------|
| <b>Heart failure</b>               | 402.01, 402.11, 402.91, 404.01, 404.03, 404.11, 404.13, 404.91, 404.93, 428.xx               |
| <b>Acute myocardial infarction</b> | 410.xx excluding those with 410.x2 (acute myocardial infarction, subsequent episode of care) |
| <b>Pneumonia</b>                   | 480.x, 481, 482.xx, 483.x, 485, 486, 487.0, and 488.11                                       |

---

ICD-9-CM: International Classification of Diseases, Ninth Revision, Clinical Modification

**Web Appendix Table 2. Age-Sex-Race Standardized Relative Risks of Hospitalization and Death Comparing Study Populations to the Medicare Fee-for-Service Population**

| Discharge Diagnosis                | Outcome                | Age-Sex-Race Standardized Cumulative Incidence Ratio<br>by Day After Discharge (95% CI) |                  |                  |               |               |
|------------------------------------|------------------------|-----------------------------------------------------------------------------------------|------------------|------------------|---------------|---------------|
|                                    |                        | 30                                                                                      | 60               | 90               | 180           | 365           |
| <b>Heart Failure</b>               | <b>Hospitalization</b> | 15.8 (15.7-15.9)                                                                        | 11.6 (11.6-11.7) | 8.5 (8.4-8.5)    | 6.0 (6.0-6.0) | 3.5 (3.5-3.5) |
|                                    | <b>Death</b>           | 17.8 (17.7-18.0)                                                                        | 14.2 (14.1-14.3) | 11.0 (11.0-11.1) | 8.9 (8.8-8.9) | 6.3 (6.3-6.3) |
| <b>Acute Myocardial Infarction</b> | <b>Hospitalization</b> | 11.8 (11.7-11.8)                                                                        | 8.2 (8.1-8.2)    | 6.4 (6.4-6.5)    | 4.2 (4.2-4.2) | 2.6(2.5-2.6)  |
|                                    | <b>Death</b>           | 15.9 (15.8-16.1)                                                                        | 11.4 (11.3-11.5) | 8.4 (8.4-8.5)    | 6.4 (6.4-6.4) | 4.3 (4.3-4.4) |
| <b>Pneumonia</b>                   | <b>Hospitalization</b> | 11.5 (11.4-11.5)                                                                        | 8.4 (8.4-8.4)    | 6.2 (6.2-6.2)    | 4.6 (4.6-4.6) | 2.9 (2.9-2.9) |
|                                    | <b>Death</b>           | 18.0 (17.9-18.2)                                                                        | 13.8 (13.7-13.9) | 10.4 (10.3-10.4) | 8.1 (8.0-8.1) | 5.6 (5.6-5.6) |

CI: confidence interval

**Web Appendix Figure 1: Flow Diagrams Describing Patient Exclusions for Heart Failure, Acute Myocardial Infarction, and Pneumonia Cohorts.**

**1) Heart Failure**

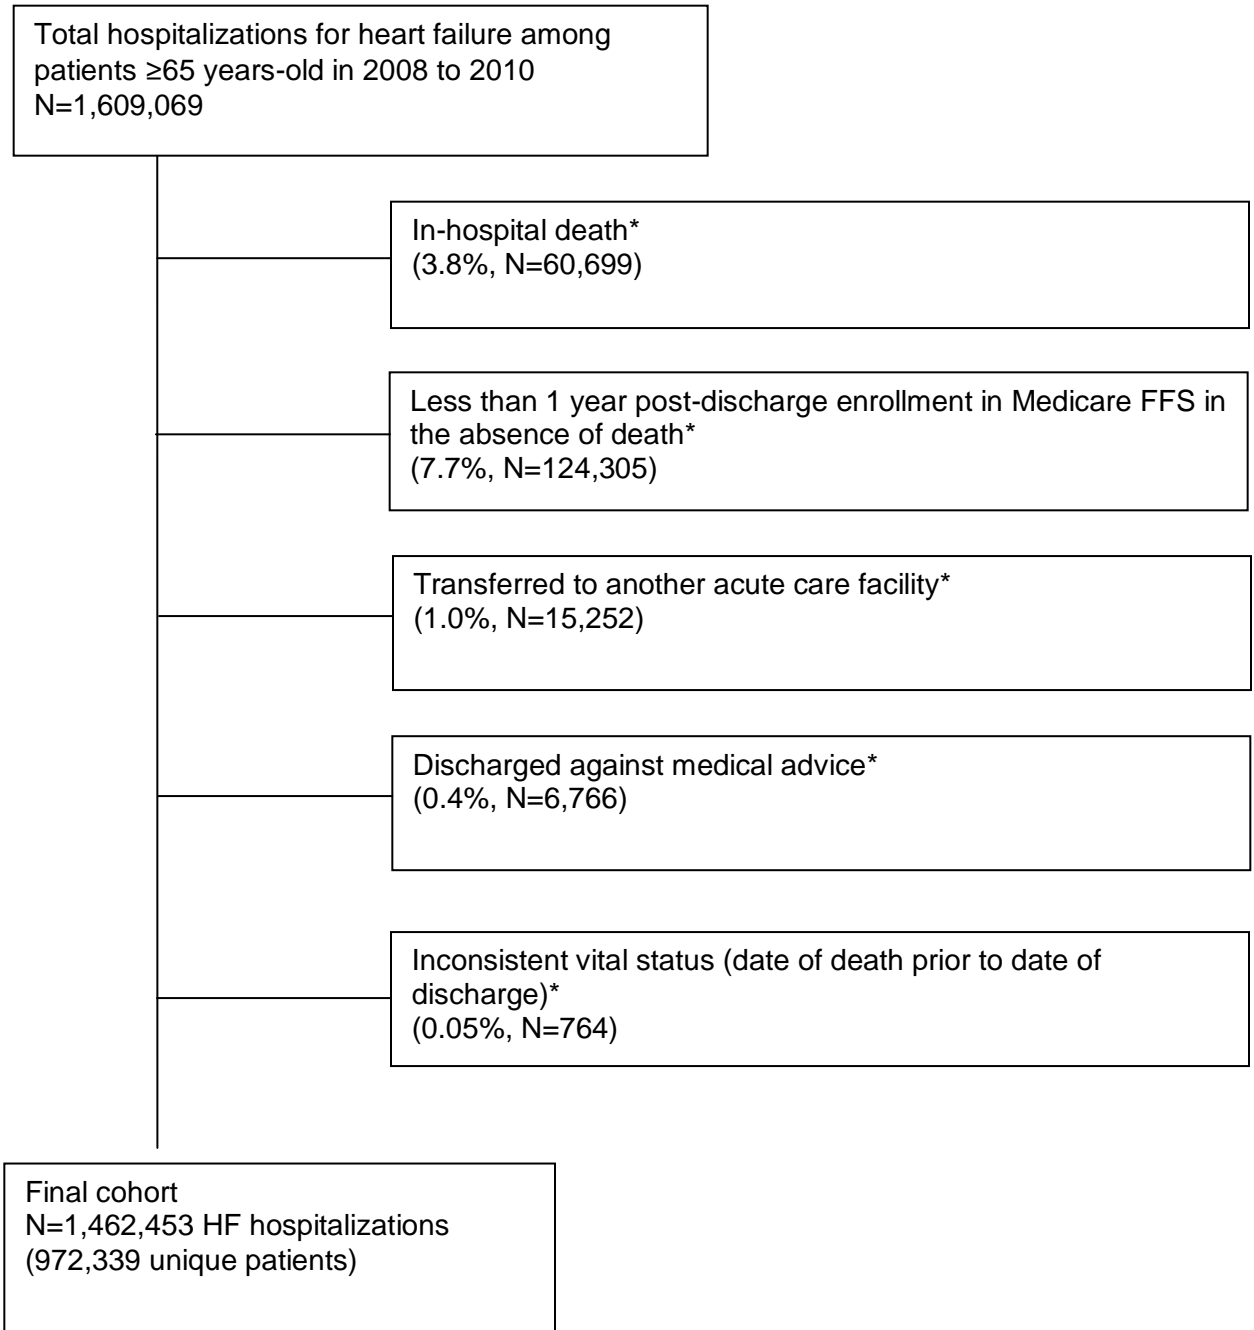

\*Categories are not mutually exclusive

## 2) Acute Myocardial Infarction

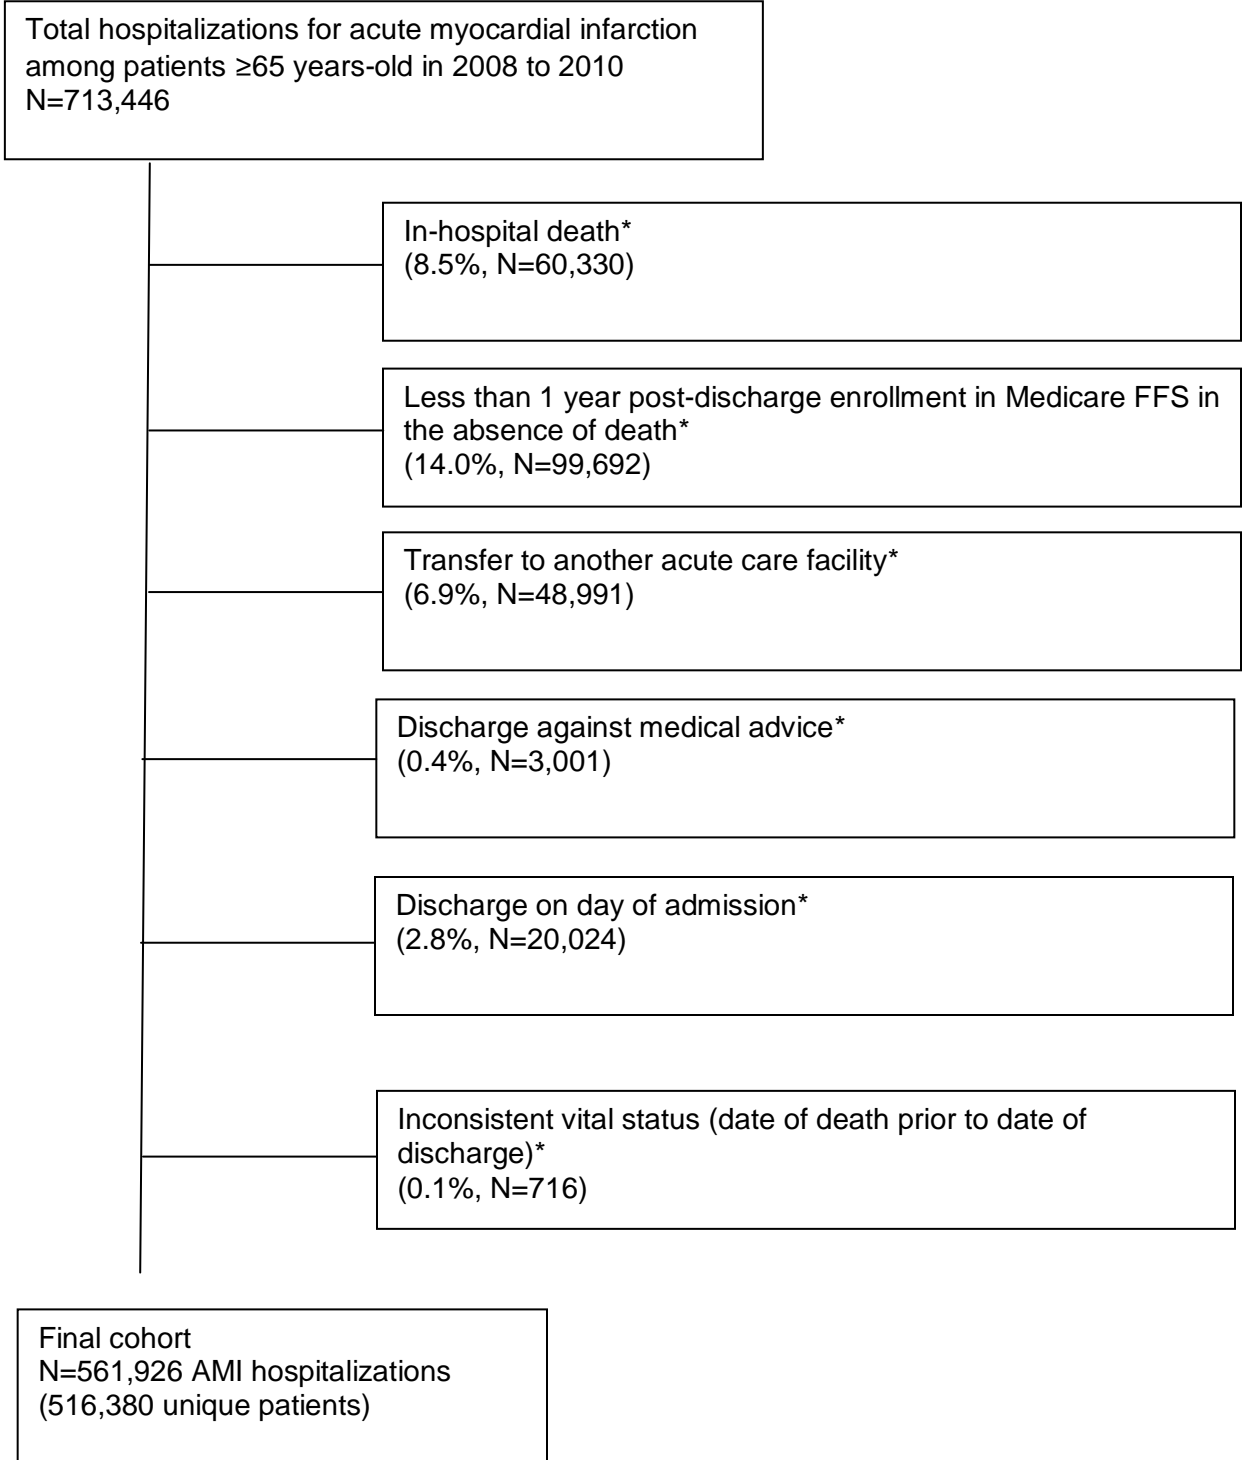

\*Categories are not mutually exclusive

### 3) Pneumonia

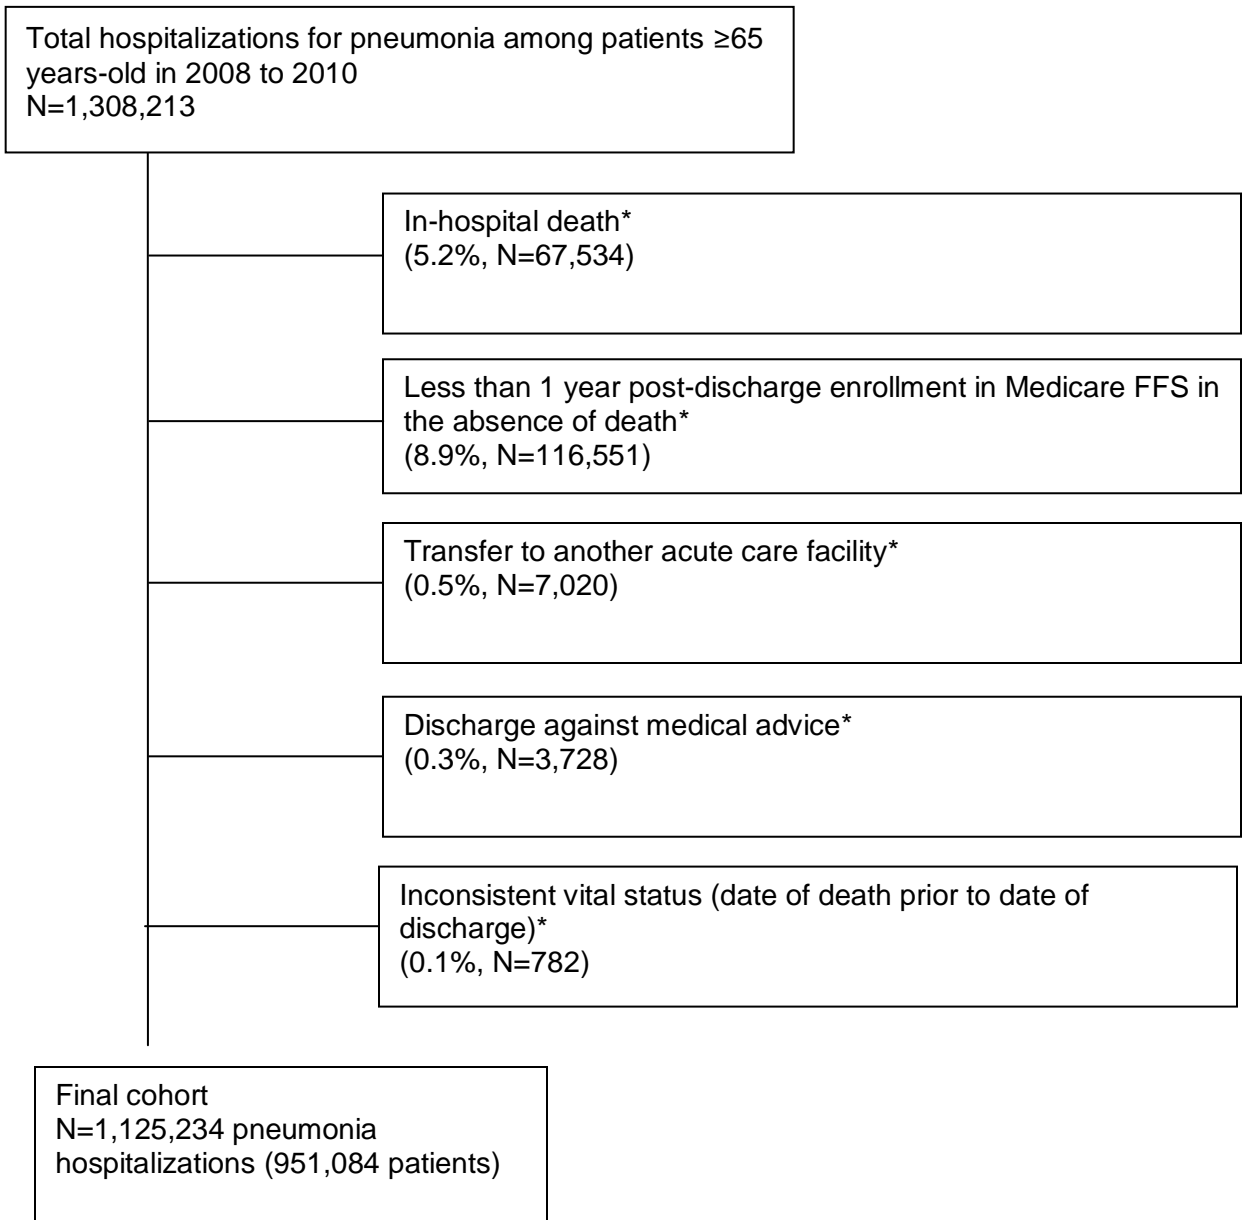

\*Categories are not mutually exclusive

Web Appendix Figure 2. Risk of First Rehospitalization and Death by Day after Hospitalization for Heart Failure, Acute Myocardial Infarction, or Pneumonia

A. First Rehospitalization

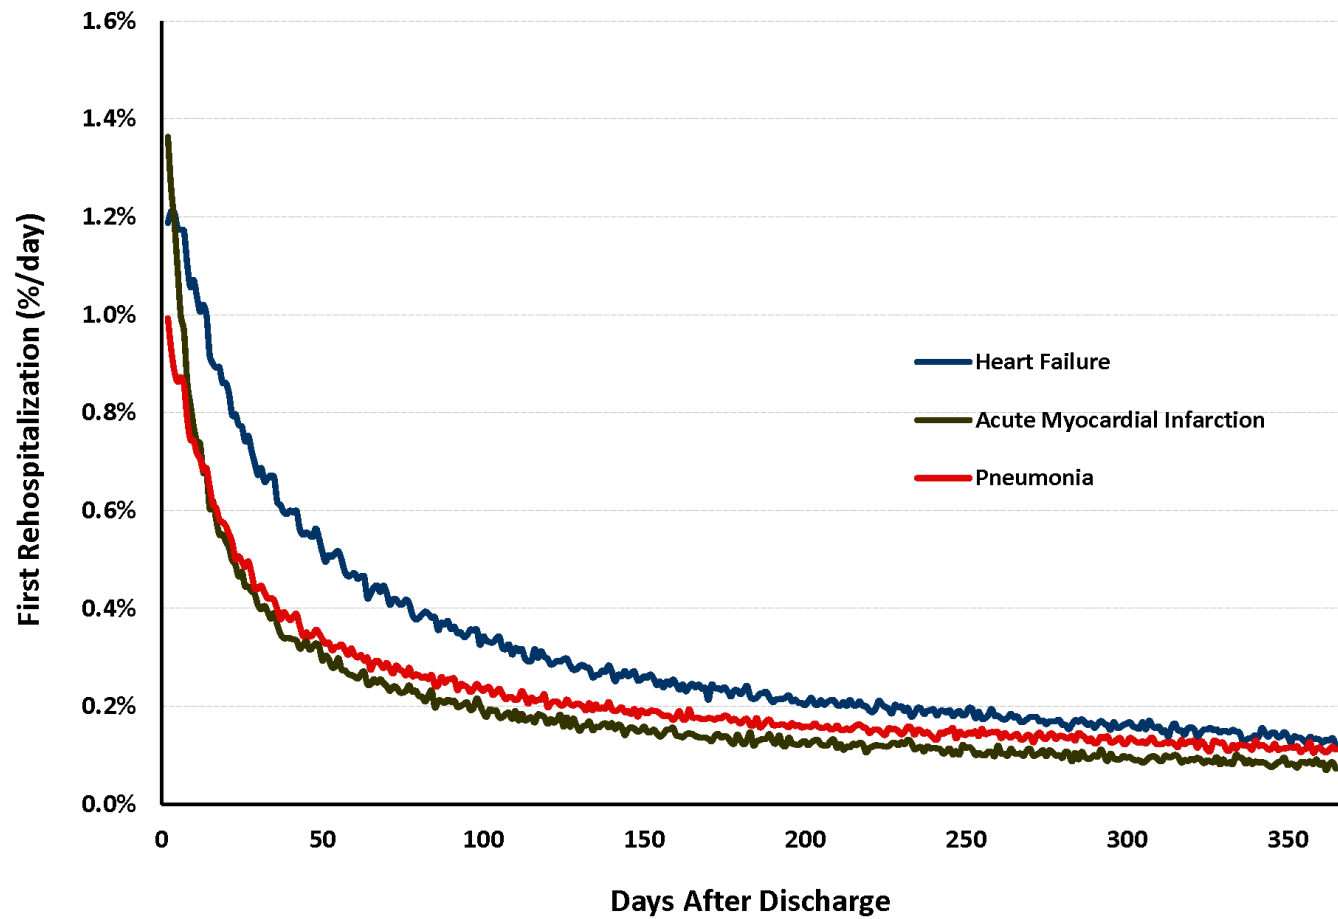

## B. Death

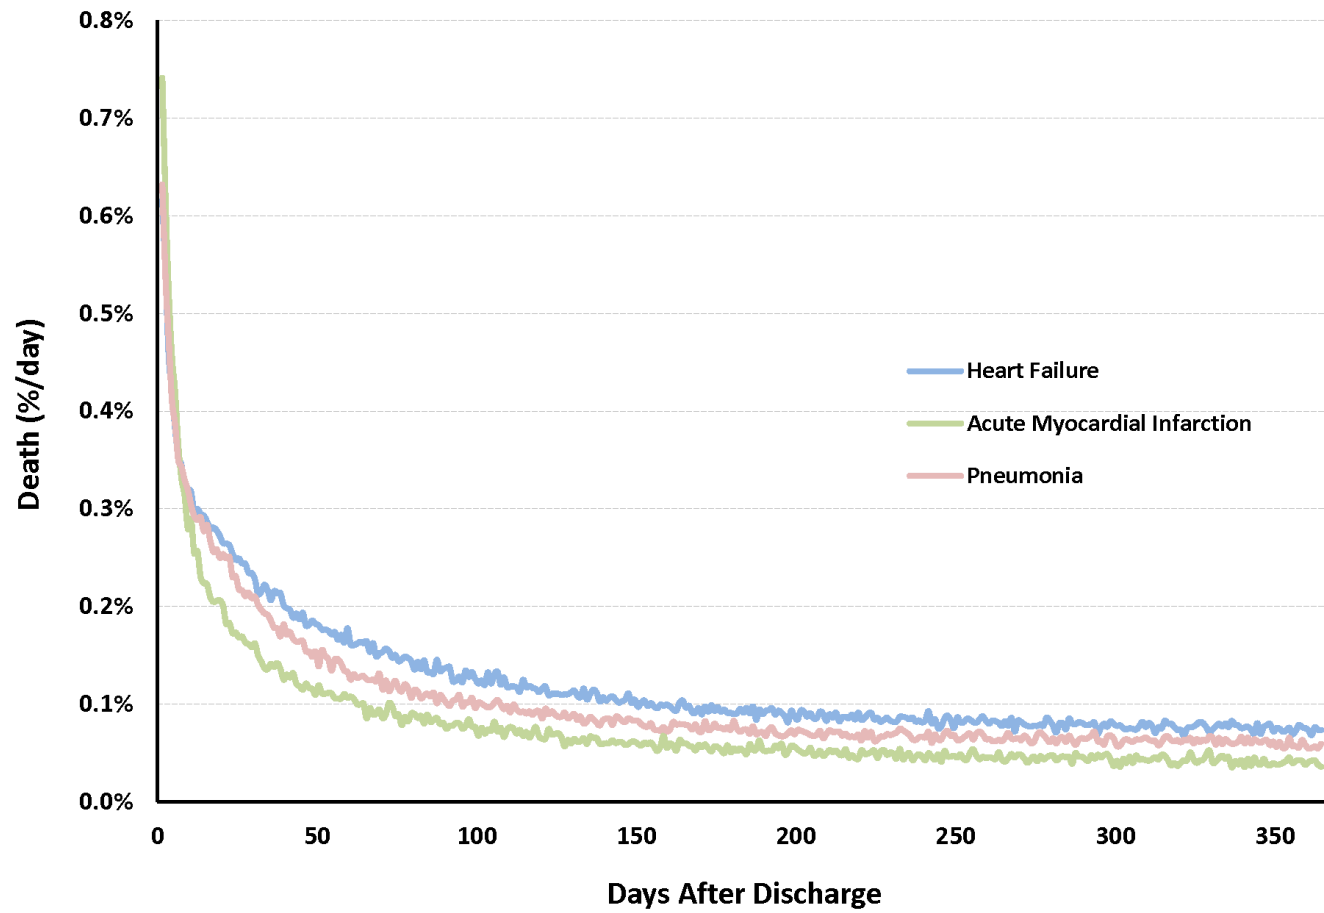



**Web Appendix Figure 3. Cumulative Incidence Functions for Competing Risk Analysis of First Rehospitalization by Day After Hospitalization for Heart Failure, Acute Myocardial Infarction, or Pneumonia**

**A. Heart Failure**

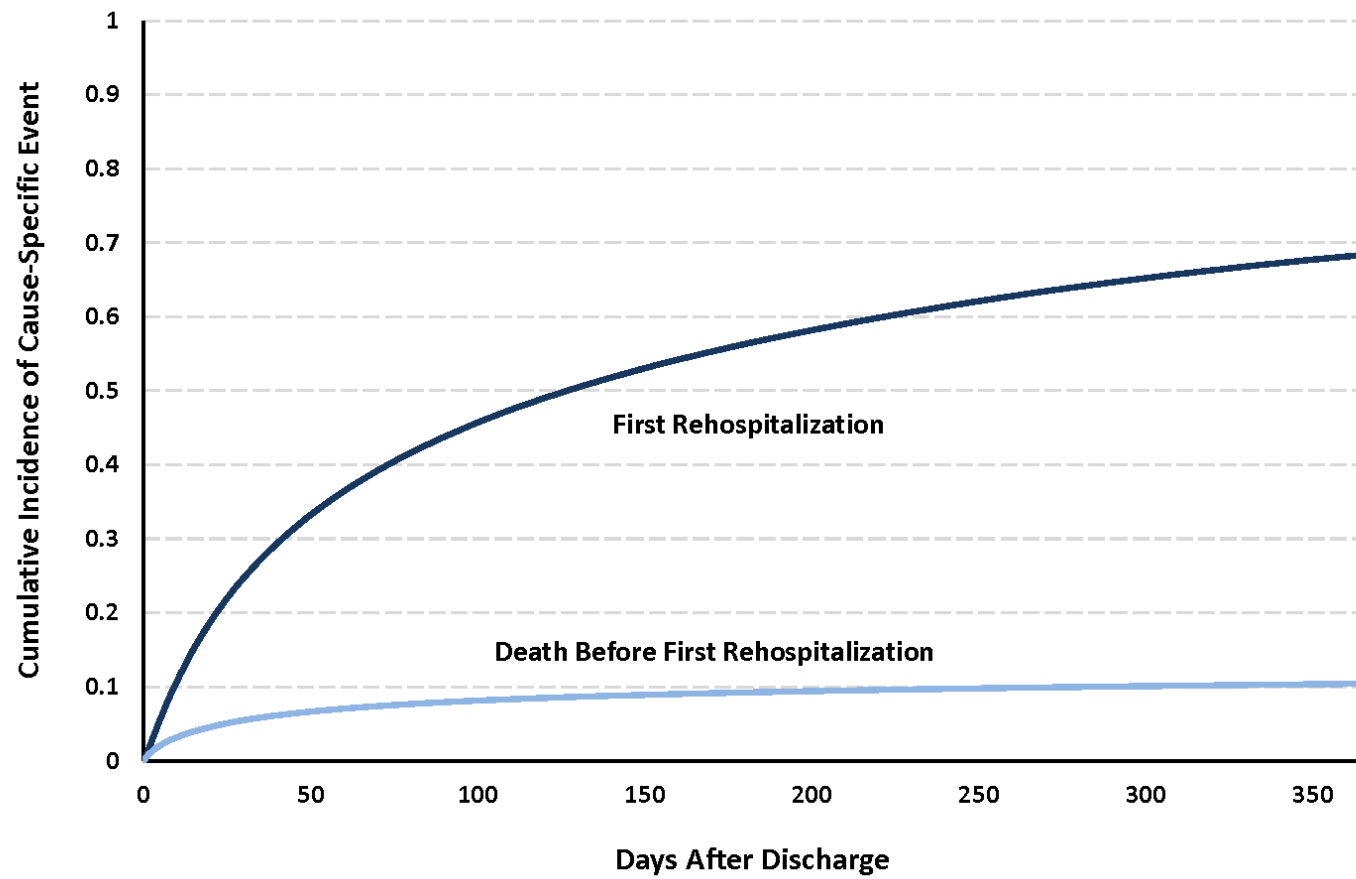

## B. Acute Myocardial Infarction

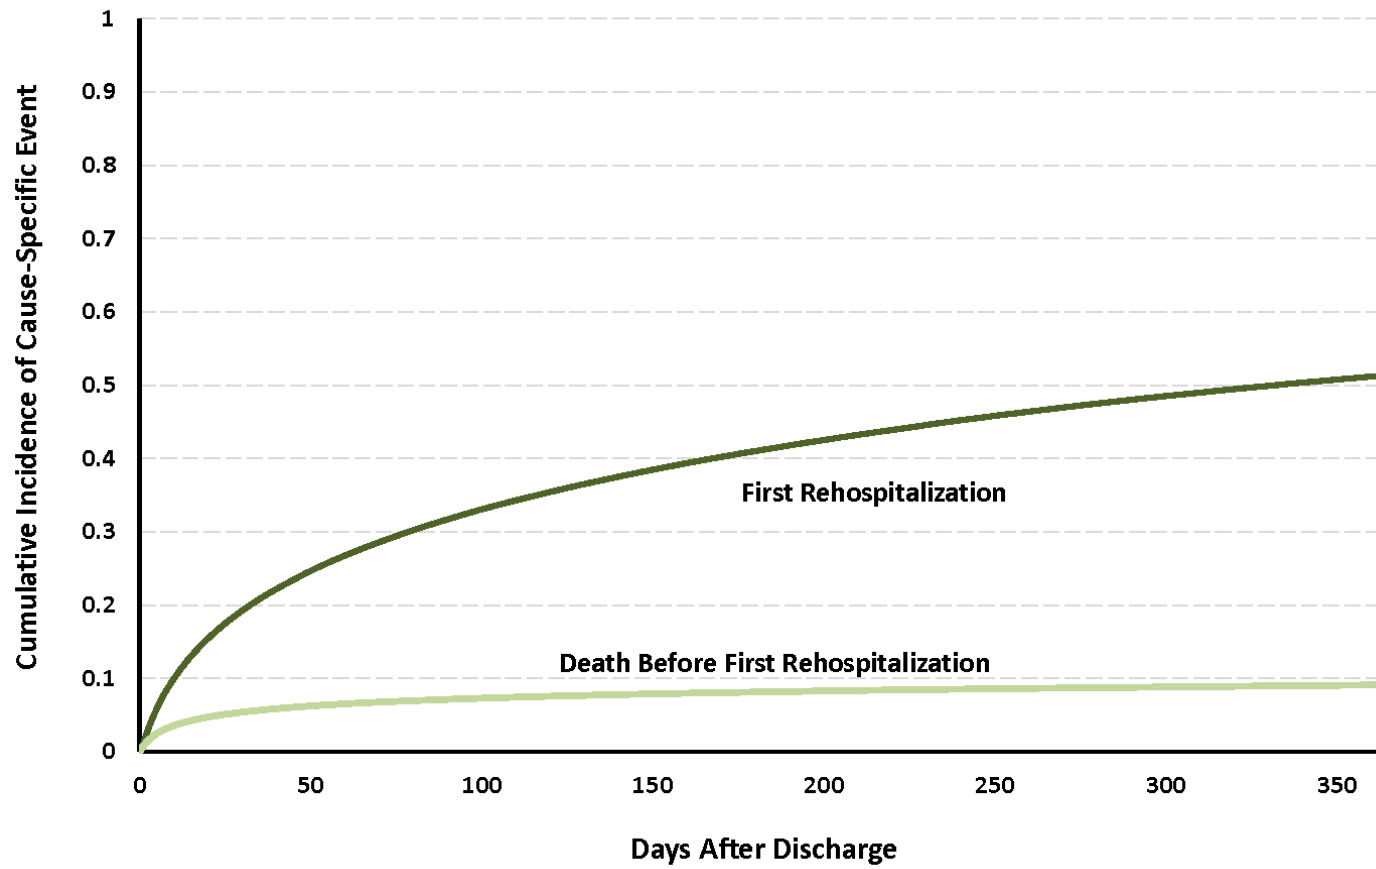

### C. Pneumonia

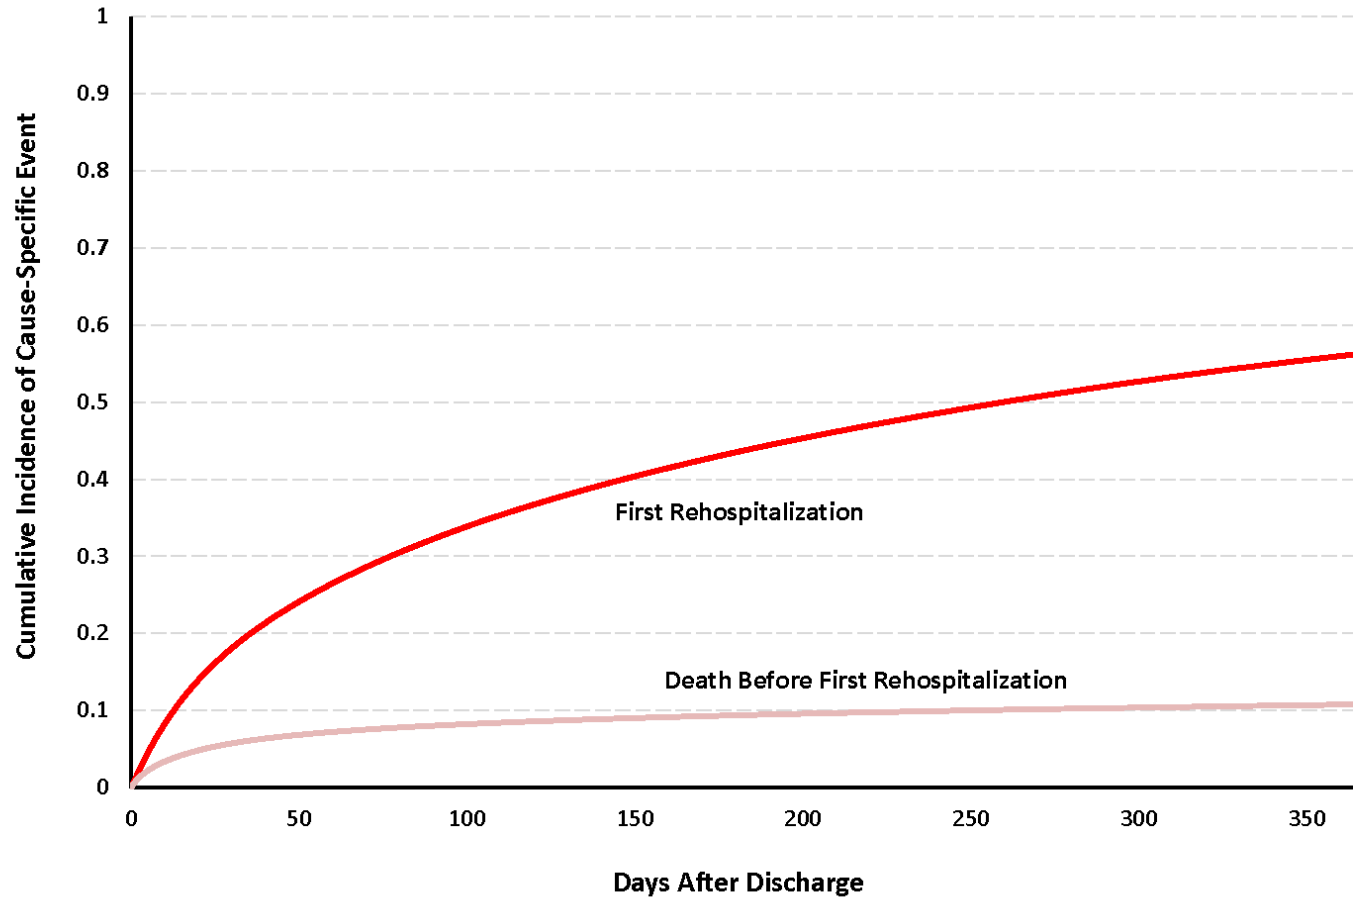

Supplement: dhak022549.ww1_default.pdf [file dhak022549.ww1_default.pdf]
